# Supplementary material for: Synthesis, structure and nonlinear optical properties of solution-processed Bi2TeO5 nanocrystals
Source: Royal Society of Chemistry journal article supplement (doi:10.1039/c8tc04450c), 2018-01-01
Supplement: c8tc04450c1.pdf [file c8tc04450c1.pdf]

## Supporting Information

# Synthesis, structure and nonlinear optical properties of solution-processed Bi<sub>2</sub>TeO<sub>5</sub> nanocrystals

*Bin Chen, Xingzhi Wang, Junqin Li, Qihua Xiong and Chaohua Zhang\**

**Table S1.** Boiling temperature of the water and ethylene glycol mixed solvent at different composition, as well as the corresponding effect on the final products of the reaction.

| Ethylene glycol (ml) | Water (ml) | Boiling temperature (°C) | Final products                   |
|----------------------|------------|--------------------------|----------------------------------|
| 40                   | 0          | ~196                     | Bi <sub>2</sub> Te <sub>3</sub>  |
| 40                   | 1          | ~180                     | -                                |
| 40                   | 2          | ~164                     | -                                |
| 40                   | 3          | ~154                     | Bi <sub>2</sub> Te <sub>3</sub>  |
| 40                   | 4          | ~148                     | -                                |
| 40                   | 5          | ~141                     | Bi <sub>2</sub> TeO <sub>5</sub> |
| 40                   | 6          | ~136                     | Bi <sub>2</sub> TeO <sub>5</sub> |
| 40                   | 7          | ~131                     | Bi <sub>2</sub> TeO <sub>5</sub> |
| 40                   | 8          | ~128                     | Bi <sub>2</sub> TeO <sub>5</sub> |

Note: The precursors Bi(OOCCH<sub>3</sub>)<sub>3</sub>, K<sub>2</sub>TeO<sub>3</sub>·H<sub>2</sub>O and KOH were set to 1.0, 1.5 and 10 mmol respectively, and the reaction time was set to 3 hours.

**Table S2.** The reaction yield of 4 Bi<sub>2</sub>TeO<sub>5</sub> nanocrystals with different growth conditions. The reaction yield is calculated by the ratio of the experimental weight and theoretical weight.

| <b>Sample</b> | <b>H<sub>2</sub>O<br/>(ml)</b> | <b>KOH<br/>(mmol)</b> | <b>Temperature<br/>(°C)</b> | <b>Theoretical<br/>weight (g)</b> | <b>Experimental<br/>weight (g)</b> | <b>Yield</b> |
|---------------|--------------------------------|-----------------------|-----------------------------|-----------------------------------|------------------------------------|--------------|
| <b>1</b>      | 8                              | 1                     | ~128                        | 0.3128                            | 0.2645                             | 84.56%       |
| <b>2</b>      | 7                              | 1                     | ~131                        | 0.3128                            | 0.2647                             | 84.62%       |
| <b>3</b>      | 6                              | 1                     | ~136                        | 0.3128                            | 0.2623                             | 83.86%       |
| <b>4</b>      | 6                              | 5                     | ~136                        | 0.3128                            | 0.2540                             | 81.20%       |

Note: Other same parameters: Bi(OOCCH<sub>3</sub>)<sub>3</sub> 1 mmol; K<sub>2</sub>TeO<sub>3</sub>·H<sub>2</sub>O 0.5 mmol; PVP 0.4 g; EG 40 ml.

**Table S3.** The comparison of solution growth strategies for different NLO nanocrystals.

| <b>Solution-growth</b>               | <b>Growth time</b> | <b>Reaction temperature</b> | <b>Preparation process</b>                                  | <b>Morphology control</b> | <b>Reference</b> |
|--------------------------------------|--------------------|-----------------------------|-------------------------------------------------------------|---------------------------|------------------|
| <b>LiNbO<sub>3</sub></b>             | 30-96 h            | 220 °C                      | Without post-treatment                                      | Size control              | Ref. 15          |
| <b>BaTiO<sub>3</sub></b>             | 66 h               | 220 °C                      | Need protecting gas and pre-treatment                       | Size control              | Ref. 14          |
| <b>KTiOPO<sub>4</sub></b>            | ~56 h              | 100°C then 700 °C           | Multiple heat treatment                                     | Sizes control             | Ref. 13          |
| <b>Bi<sub>2</sub>TeO<sub>5</sub></b> | 3 h                | 128-141 °C                  | Without further heat treatment or the use of protecting gas | Sizes and Shapes control  | This work        |

Note: The reference number corresponds to the citation number in the manuscript.

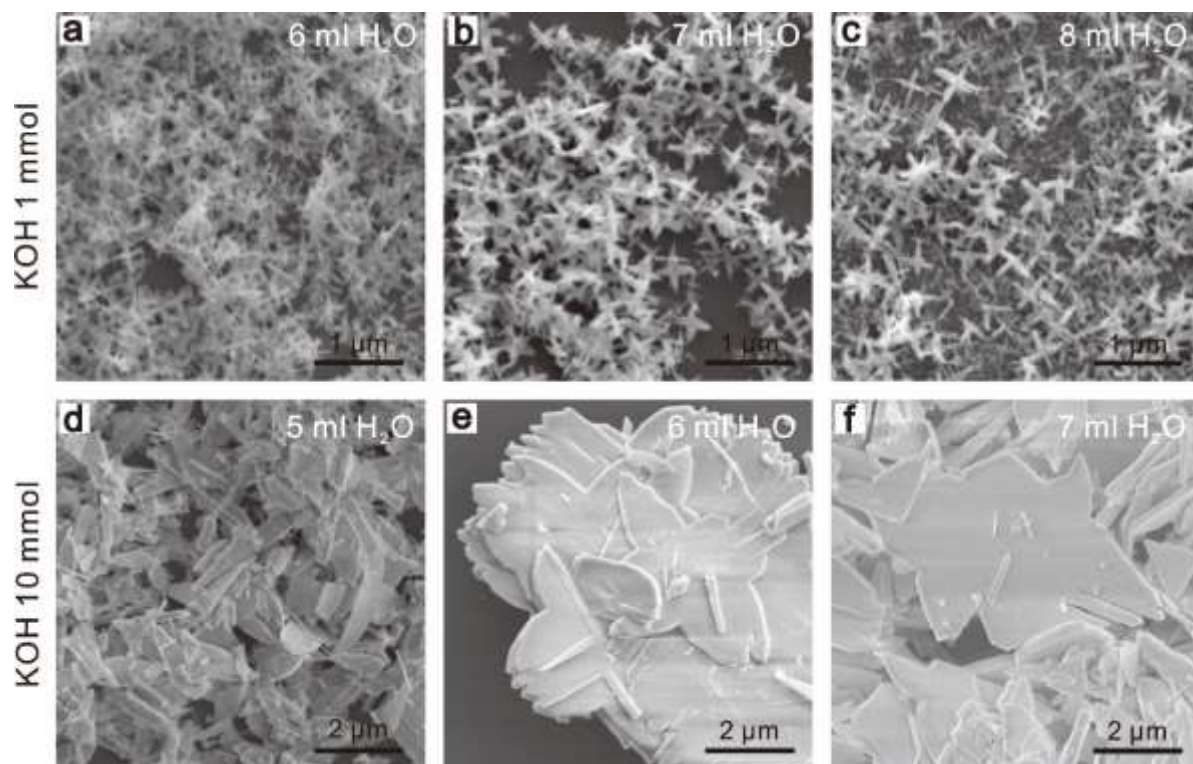

**Figure S1. Morphology control of the  $\text{Bi}_2\text{TeO}_5$  nanocrystals by tuning the mixed solvent.**

The added  $\text{H}_2\text{O}$  is set to (a) 6, (b) 7 and (c) 8 ml with 1mmol KOH, and (d) 5, (e) 6 and (f) 8 ml with 10 mmol KOH. The other same growth parameters are set as: 40 ml EG; 1 mmol  $\text{Bi}(\text{OOCCH}_3)_3$  and 0.5 mmol  $\text{K}_2\text{TeO}_3 \cdot \text{H}_2\text{O}$ .

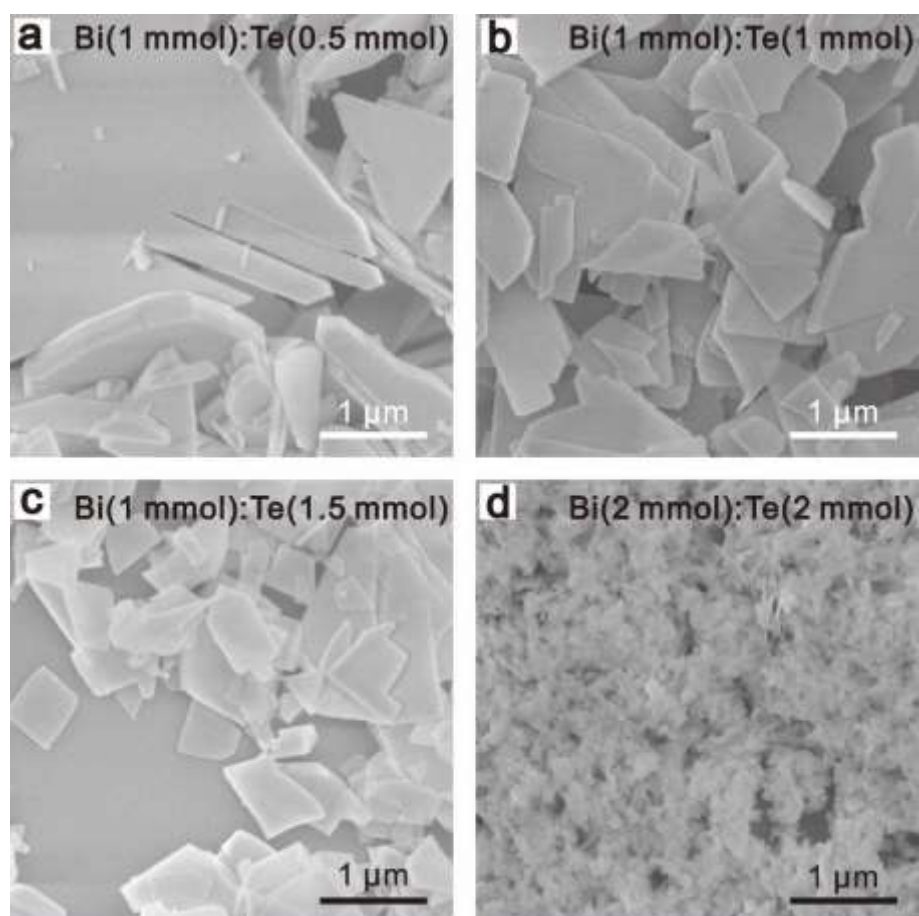

**Figure S2. Morphology control of the  $\text{Bi}_2\text{TeO}_5$  nanocrystals by tuning the precursors.** The added  $\text{Bi}(\text{OOCCH}_3)_3 - \text{K}_2\text{TeO}_3 \cdot \text{H}_2\text{O}$  is set to (a) 1 mmol-0.5 mmol, (b) 1 mmol-1 mmol, (c) 1 mmol-1.5 mmol and (d) 2 mmol-2 mmol respectively. The other same growth parameters are set as: 40 ml EG/6ml  $\text{H}_2\text{O}$  mixed solvent; 10 mmol KOH.

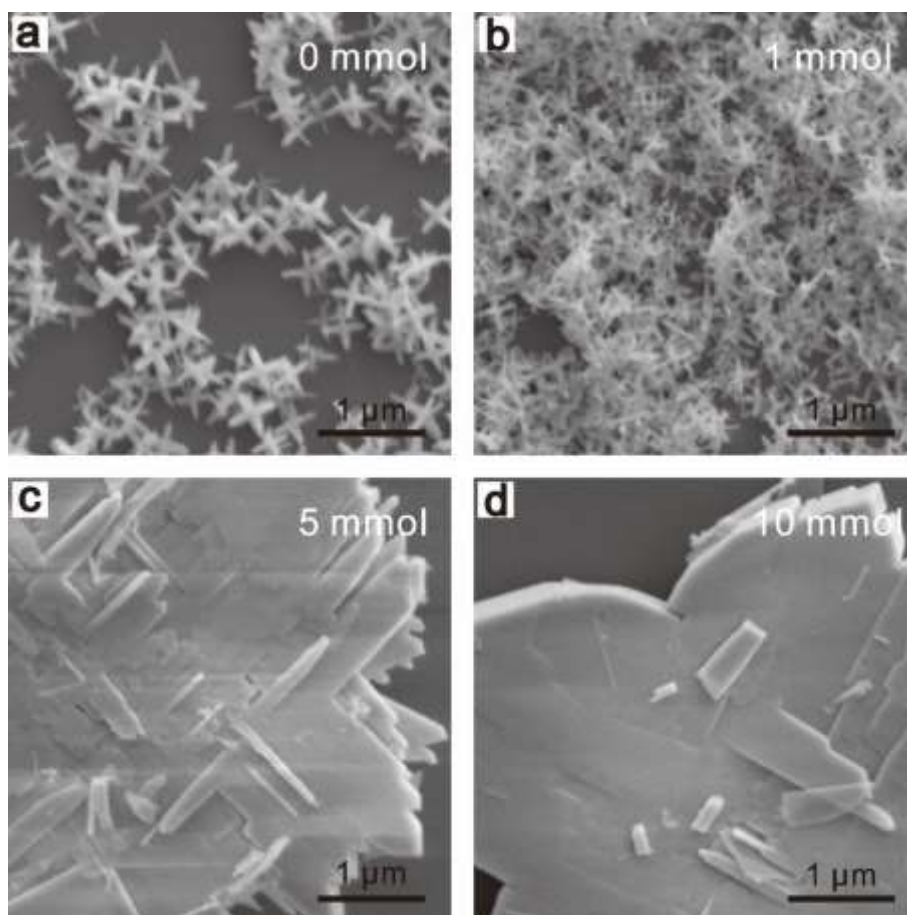

**Figure S3. Morphology control of the Bi<sub>2</sub>TeO<sub>5</sub> nanocrystals by KOH.** The added KOH is set to (a) 0, (b) 1, (c) 5 and (d) 10 mmol in the 4 samples respectively. The other same growth parameters are set as: 40 ml EG/6ml H<sub>2</sub>O mixed solvent; 1 mmol Bi(OOCCH<sub>3</sub>)<sub>3</sub> and 0.5 mmol K<sub>2</sub>TeO<sub>3</sub>·H<sub>2</sub>O.

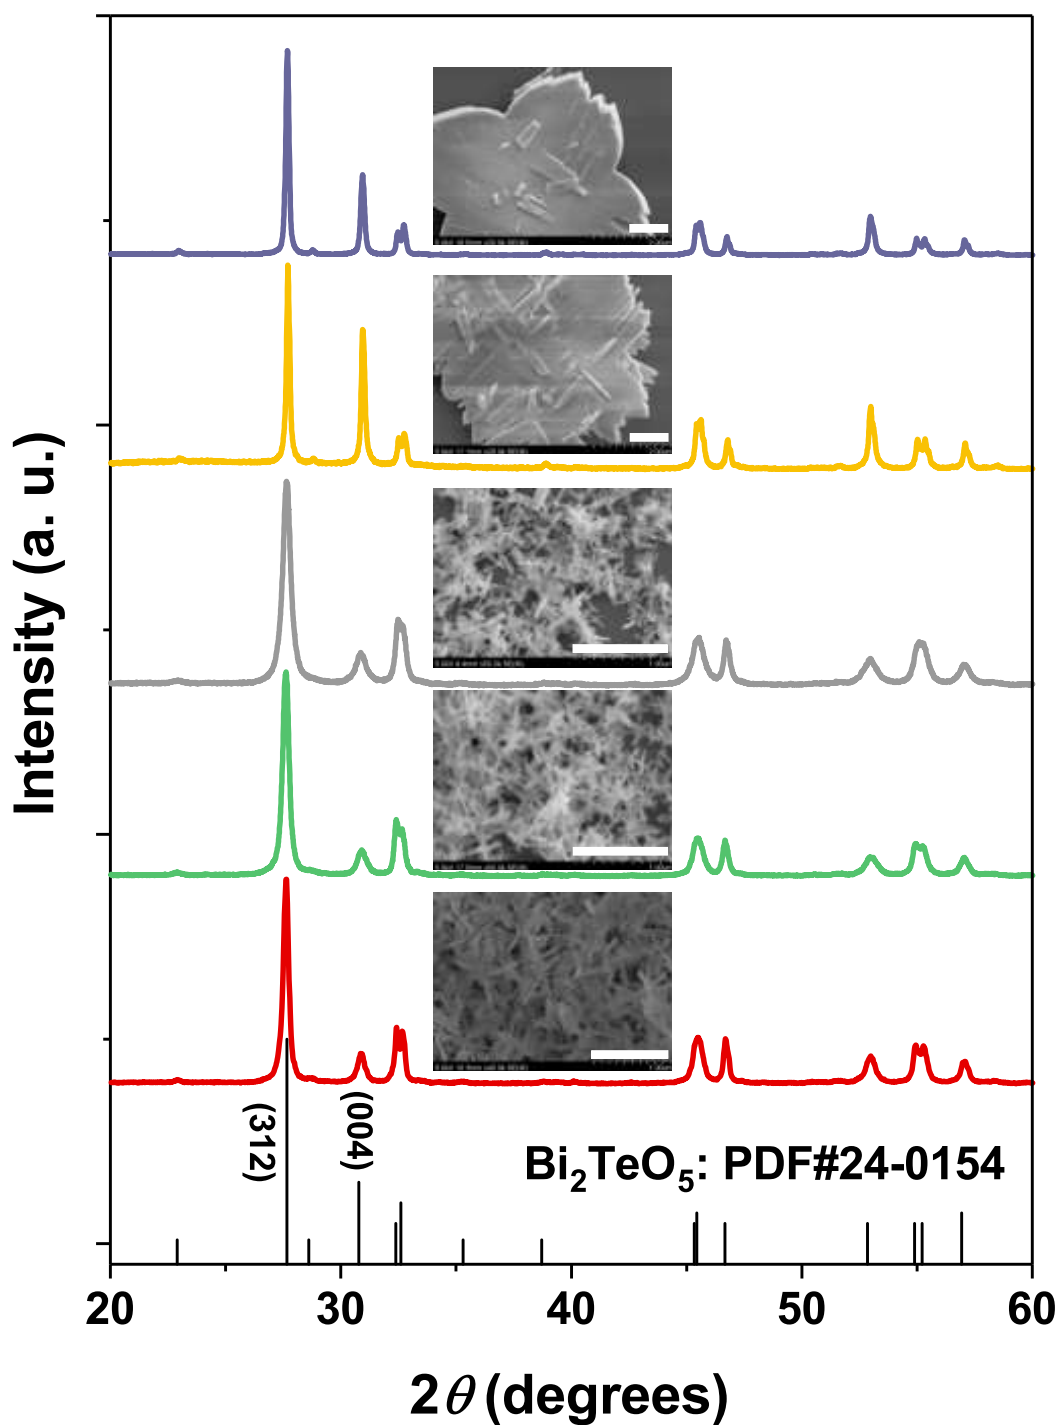

**Figure S4.** XRD patterns of 5 different  $\text{Bi}_2\text{TeO}_5$  nanocrystals under different growth conditions, which agree well with the reference  $\text{Bi}_2\text{TeO}_5$  crystal structure (PDF#24-0154, Cell:  $16.45 \text{ \AA} \times 5.52 \text{ \AA} \times 11.61 \text{ \AA}$ ,  $\alpha=\beta=\gamma=90^\circ$ ). The scale bars in the inset SEM images are  $1 \mu\text{m}$ . The peak (004) increases as the crystal size of the samples increase, indicating the tendency of forming layered structures when those nanocrystals grow larger.
